# Supplementary material
Source: publisher figshare collection journal article supplement (https://acs.figshare.com/ndownloader/files/5928204)
Supplement: Supplementary file 1 [file 5928204]

Compound_ID	SMILES	IC50 or other compound property (optional)	Other compound property (optional)	Other compound property (optional)
6	Cc1cc([nH]c(=O)c1CNC(=O)c2cccc(c2C)OC)C
7	Cc1ccccc1C(=O)NCc2c(cc([nH]c2=O)C)C
8	Cc1cc([nH]c(=O)c1CNC(=O)c2cccc(c2)OC)C
9	CCOc1cccc(c1C)C(=O)NCc2c(cc([nH]c2=O)C)C
10	Cc1cc([nH]c(=O)c1CNC(=O)c2cccc(c2C)OC(C)C)C
11	Cc1cc([nH]c(=O)c1CNC(=O)c2cccc(c2F)OC)C
12	Cc1cc([nH]c(=O)c1CNC(=O)c2cccc(c2OC)OC)C
13	Cc1cc([nH]c(=O)c1CNC(=O)c2cccc(c2O)OC)C
14	Cc1cc([nH]c(=O)c1CNC(=O)c2cccc(c2Cl)OC)C
15	Cc1cc([nH]c(=O)c1CNC(=O)c2cccc(c2Cl)OC(C)C)C
16	Cc1cc([nH]c(=O)c1CN2CCCc3ccc(c(c3C2=O)Cl)OC)C
17	Cc1cc([nH]c(=O)c1CN2CCOc3ccc(c(c3C2=O)Cl)OC)C
18	Cc1cc([nH]c(=O)c1CN2CCc3ccc(c(c3C2=O)Cl)OC)C
19	CCOc1ccc2c(c1Cl)C(=O)N(CC2)Cc3c(cc([nH]c3=O)C)C
20	Cc1cc([nH]c(=O)c1CN2CCc3ccc(c(c3C2=O)Cl)OC(C)C)C
21	Cc1cc([nH]c(=O)c1CN2CCc3ccc(c(c3C2=O)C)OC(C)C)C
22	Cc1cc([nH]c(=O)c1CN2CCc3ccc(cc3C2=O)OC(C)C)C
23	Cc1cc([nH]c(=O)c1CN2CCc3ccc(c(c3C2=O)Cl)O[C@@H]4CCOC4)C
24	Cc1cc([nH]c(=O)c1CN2CCc3c(cc(c(c3C2=O)Cl)O[C@@H]4CCOC4)F)C
25	Cc1cc([nH]c(=O)c1CN2CCc3c(cc(c(c3C2=O)Cl)O[C@@H]4CCOC4)C)C
26	Cc1cc([nH]c(=O)c1CN2CCc3c(cc(c(c3C2=O)Cl)O[C@@H]4CCOC4)Cl)C
27	Cc1cc([nH]c(=O)c1CN2CCc3c(cc(c(c3C2=O)Cl)c4c[nH]nc4)Cl)C
28	Cc1cc([nH]c(=O)c1CN2CCc3c(cc(c(c3C2=O)Cl)c4c[nH]nc4C)Cl)C
29	Cc1cc([nH]c(=O)c1CN2CCc3c(cc(c(c3C2=O)Cl)c4c([nH]nc4C)C)Cl)C
30	Cc1cc([nH]c(=O)c1CN2CCc3c(cc(c(c3C2=O)Cl)c4c(nn(c4C)C)C)Cl)C
31	Cc1cc([nH]c(=O)c1CN2CCc3c(cc(c(c3C2=O)Cl)c4c(noc4C)C)Cl)C
32	Cc1cc([nH]c(=O)c1CN2CCc3ccc(c(c3C2=O)Cl)c4c(noc4C)C)C
